# Supplementary material for: Intravitreal Dexamethasone Implants for Refractory Macular Edema in Eyes with Noninfectious Uveitis
Source: MDPI journal article supplement (doi:10.3390/jcm10173762), 2021-08-24
Supplement: s1 [file s1]

## Supplementary Materials

The following are available online at [www.mdpi.com/xxx/s1](http://www.mdpi.com/xxx/s1), Figure S1: The 24-month longitudinal change of (a) logMAR visual acuity, (b) central retinal thickness, and (c) intraocular pressure in patients who received single dexamethasone injection. \* $p < 0.05$ , \*\* $p < 0.01$ , \*\*\* $p < 0.001$ ; Figure S2: The Q-Q plots and results of Shapiro-Wilt test in patient's baseline logMAR visual acuity, central retinal thickness, and intraocular pressure.; Figure S3: The change in (a) LogMAR visual acuity, (b) central retinal thickness, and (c) intraocular pressure in subgroup with 37 eyes from the 37 patients. \* $p < 0.05$ , \*\*\* $p < 0.001$ .

**Figure S1**

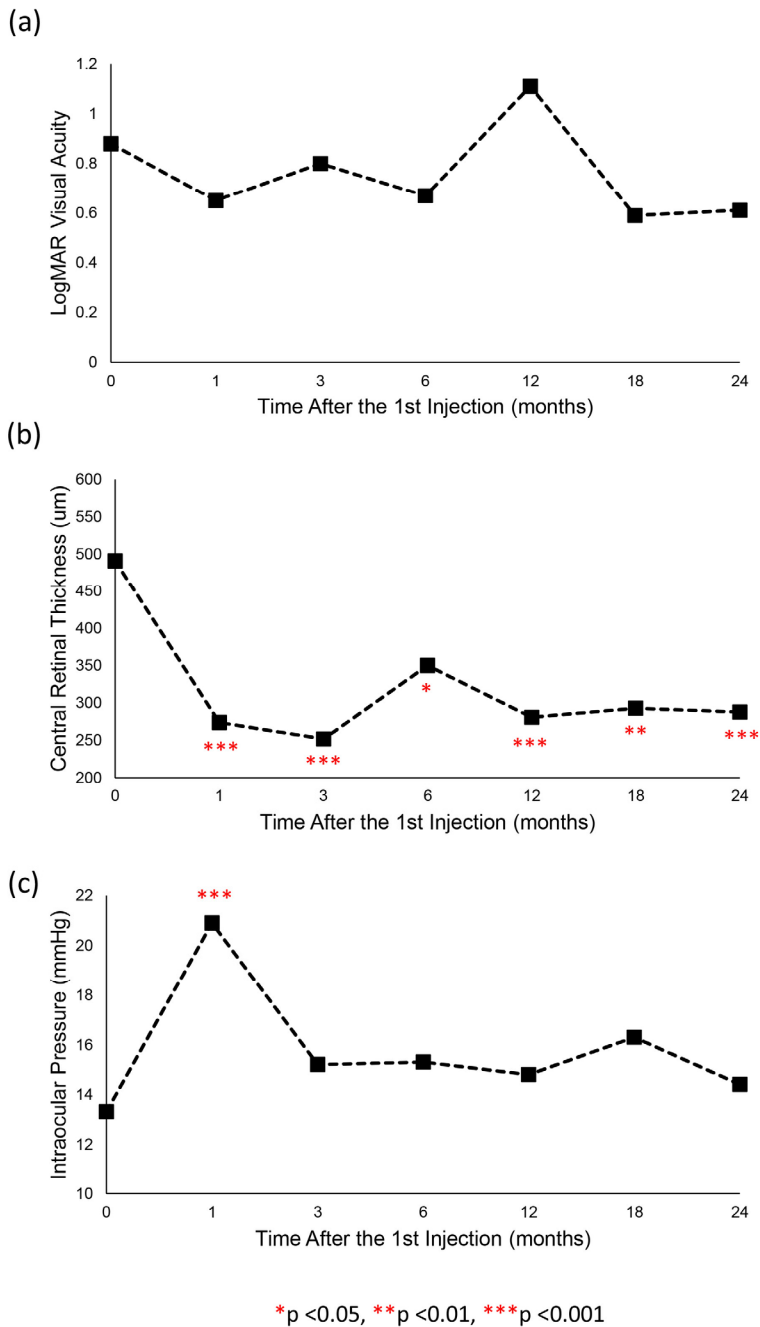

**Figure S1.** The 24-month longitudinal change of (a) LogMAR visual acuity, (b) central retinal thickness, and (c) intraocular pressure in patients received single dexamethasone injection. \*  $p < 0.05$ , \*\*  $p < 0.01$ , \*\*\*  $p < 0.001$ .

**Figure S2**

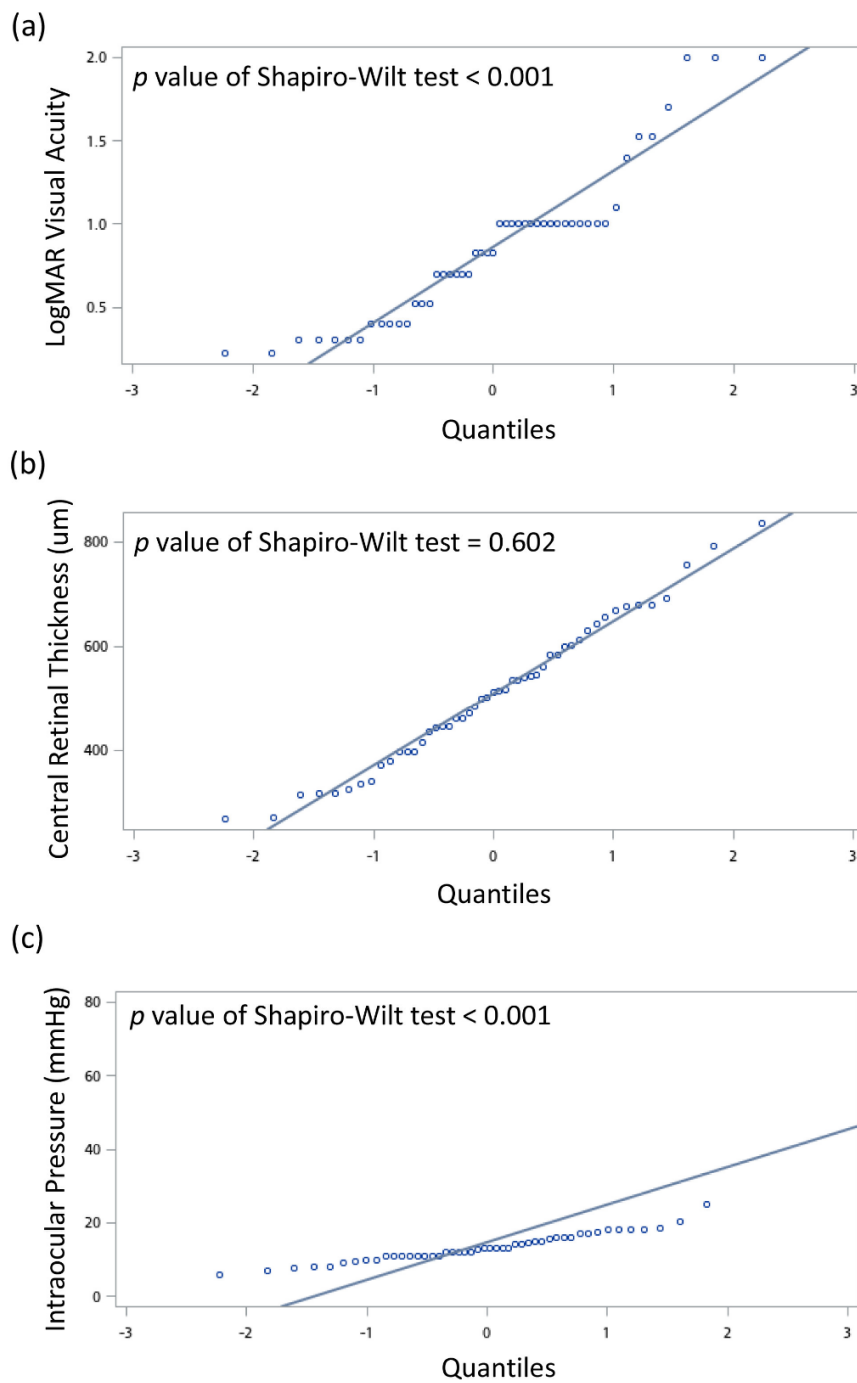

**Figure S2.** The Q-Q plots and results of Shapiro–Wilk test in patient’s baseline LogMAR visual acuity, central retinal thickness, and intraocular pressure.

Figure S3

(a)

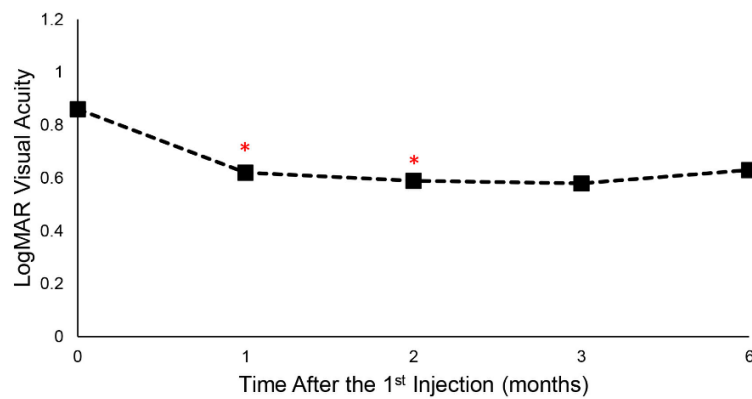

(b)

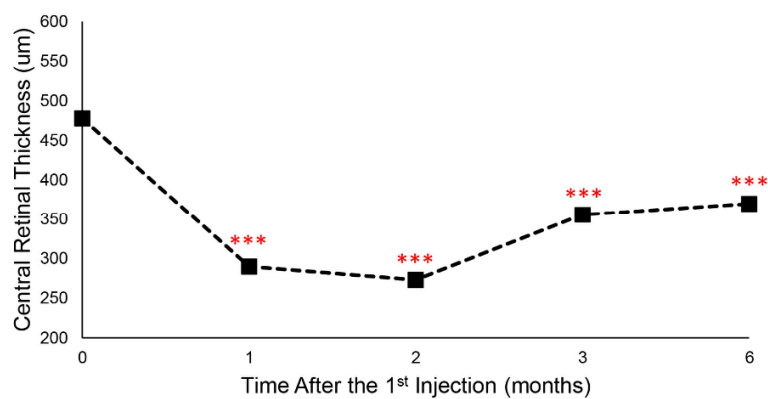

(c)

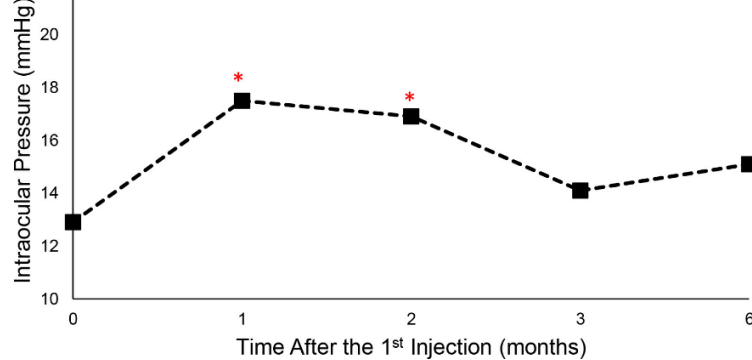

\* p < 0.05, \*\*\* p < 0.001

Figure S3. The change in (a) LogMAR visual acuity, (b) central retinal thickness, and (c) intraocular pressure in subgroup with 37 eyes from the 37 patients. \* p < 0.05, \*\*\* p < 0.001.
